# Supplementary material for: Flexible high performance lithium ion battery electrode based on a free-standing TiO2 nanocrystals/carbon cloth composite
Source: Royal Society of Chemistry journal article supplement (doi:10.1039/c6ra03262a), 2016-01-01
Supplement: c6ra03262a1.pdf [file c6ra03262a1.pdf]

**Flexible high performance Lithium Ion Battery Electrode based on Free-standing TiO<sub>2</sub> Nanocrystals/Carbon Cloth composite – Supporting Information**

Ricky Tjandra, Ge Li, Xiaolei Wang, Ji Yan ,Matthew Li, Aiping Yu\*

Department of Chemical Engineering, Waterloo Institute for Nanotechnology, University of Waterloo, Waterloo, Ontario N2L3G1, Canada

\* *Corresponding author.* [aipingyu@uwaterloo.ca](mailto:aipingyu@uwaterloo.ca)

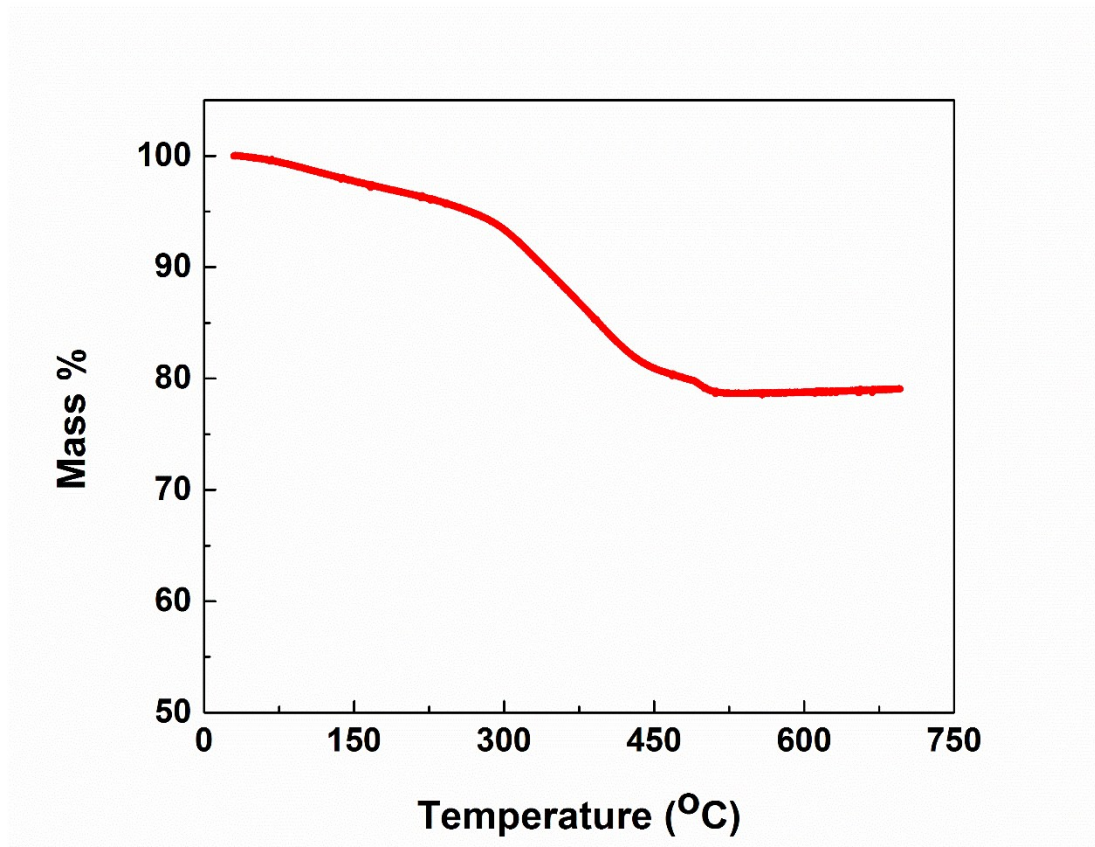

Figure S1 TGA curve for the TiO<sub>2</sub>/Oleic Acid nanocrystals

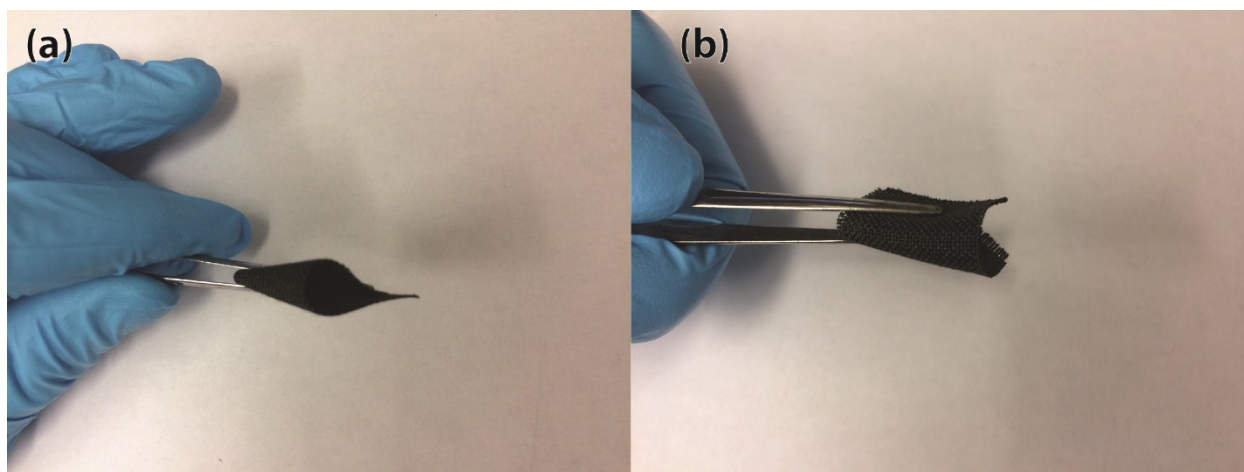

Figure S2 Figure illustrating the similarity of flexibility of (a) un-annealed carbon cloth and (b) annealed carbon cloth

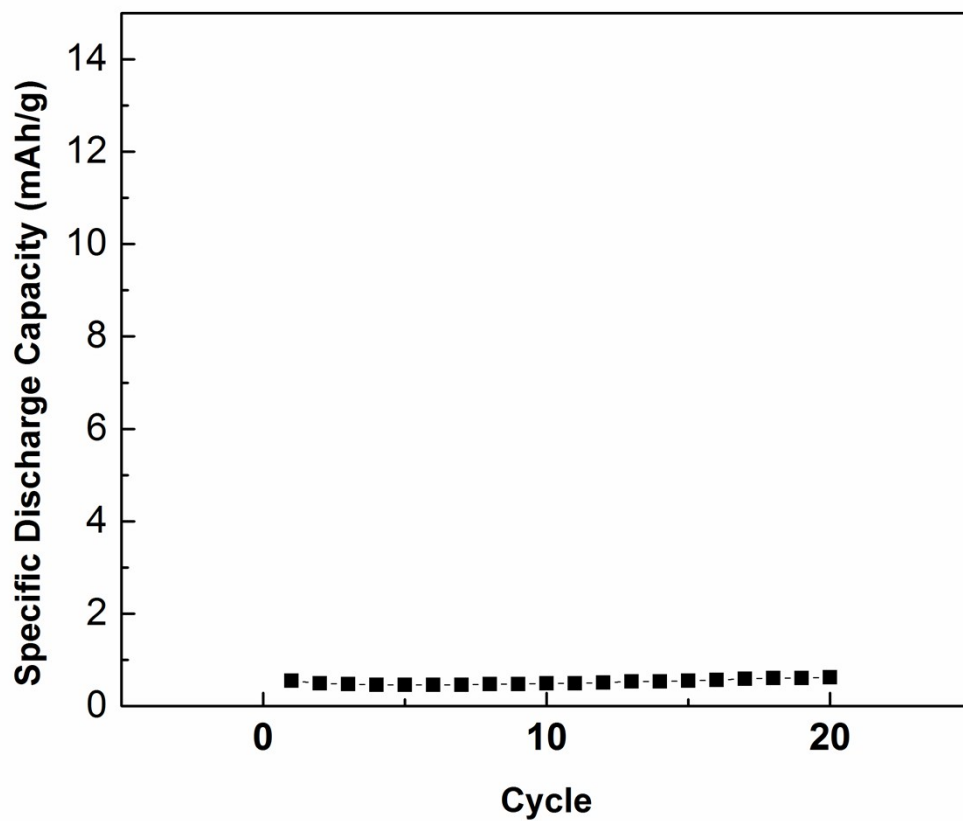

*Figure S3 Discharge capacity of neat carbon cloth over 20 charge and discharge cycles at a current density of  $100 \text{ mA g}^{-1}$*

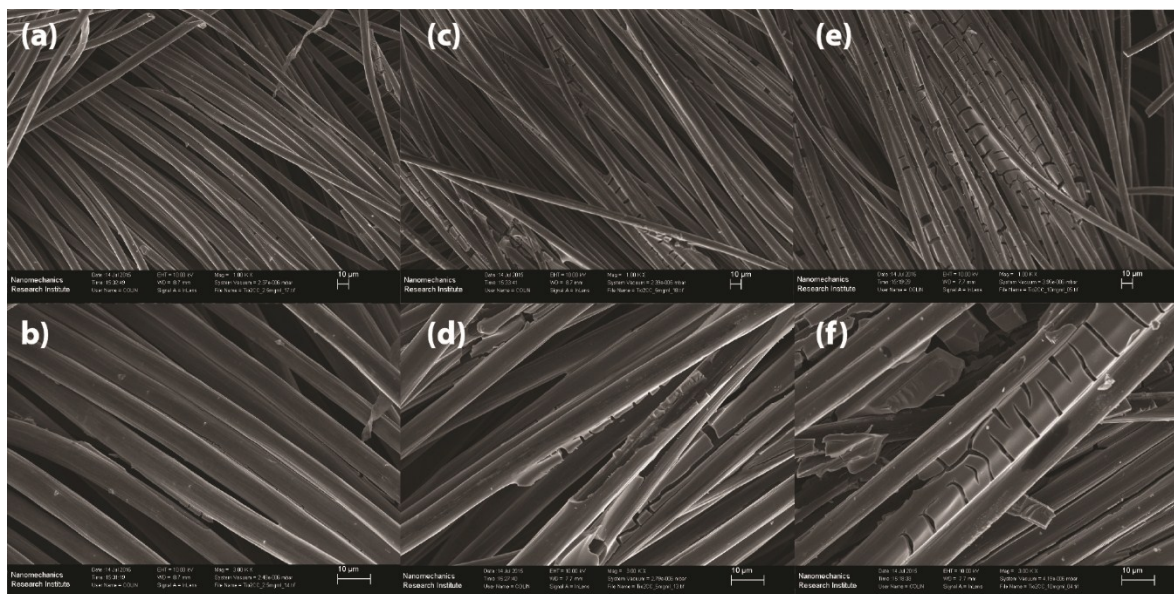

Figure S4 SEM images of the surface of composite electrodes with similar loadings made with different TiO<sub>2</sub> nanocrystal casting concentrations (a)- (b) 2.5 mg mL<sup>-1</sup>, (c)- (d) 5 mg mL<sup>-1</sup>, (e)- (f) 10 mg mL<sup>-1</sup>

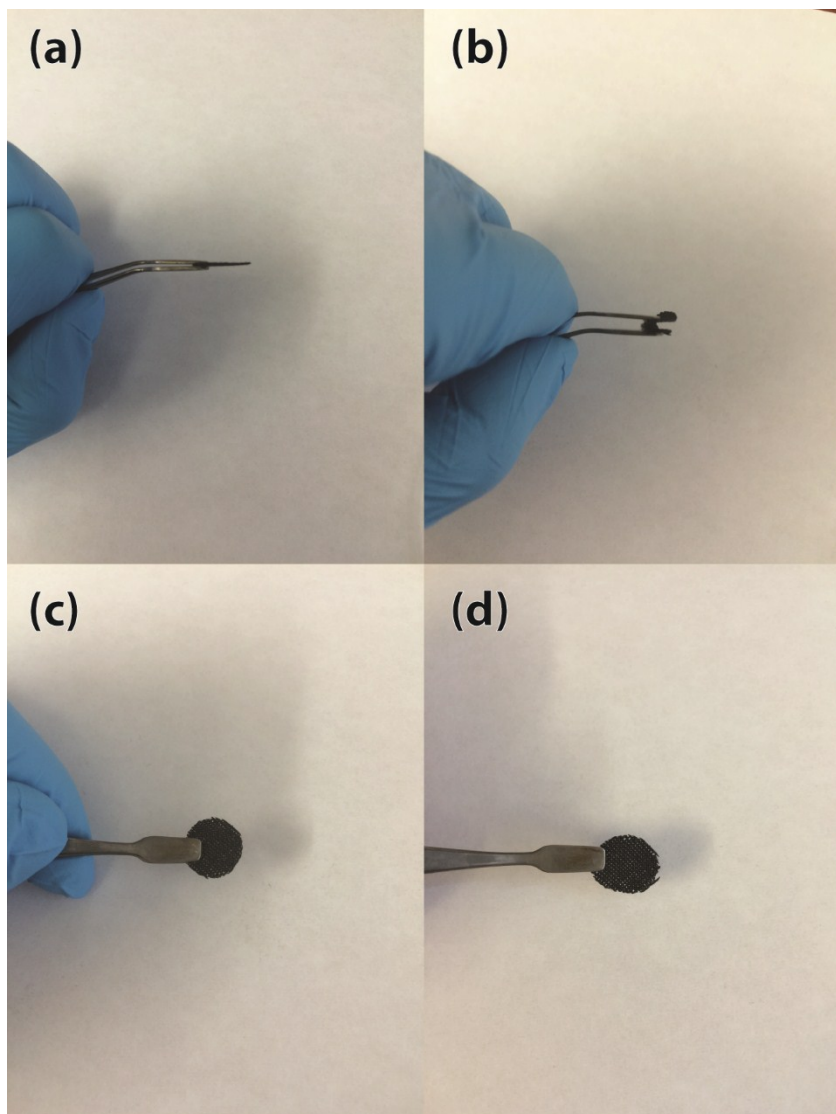

*Figure S5 Images of the flexible electrode (a) at “un-flexed” position, (b) at full, 180° flexion, (c) before 100 cycles of mechanical flexion, (d) after 100 cycles of mechanical flexion*
